# Supplementary material for: Acoustofluidic control of bubble size in microfluidic flow-focusing configuration
Source: Royal Society of Chemistry journal article supplement (doi:10.1039/c4lc01139b), 2014-12-03
Supplement: c4lc01139b1.pdf [file c4lc01139b1.pdf]

Supplementary Material (ESI) for Lab on a Chip  
This journal is © The Royal Society of Chemistry 2014

## Acoustofluidic control of bubble size in microfluidic flow-focusing configuration

Zhuang Zhi Chong,<sup>a</sup> Shu Beng Tor,<sup>a</sup> Ngiap Hiang Loh,<sup>a</sup> Teck Neng Wong,<sup>a</sup> Alfonso M. Gañán-Calvo,<sup>b</sup> Say Hwa Tan,<sup>\*a</sup> Nam-Trung Nguyen,<sup>\*c</sup>

<sup>a</sup> School of Mechanical and Aerospace Engineering, Nanyang Technological University, 50 Nanyang Avenue, Singapore 639798. Email: sayhwa.tan@gmail.com

<sup>b</sup> Depto. de Ingeniería Aeroespacial y Mecánica de Fluidos, Universidad de Sevilla, E-41092 Sevilla, Spain.

<sup>c</sup> QLD Micro- and Nanotechnology Centre, Nathan campus, Griffith University, 170 Kessels Road QLD 4111, Australia.

Email: nam-trung.nguyen@griffith.edu.au

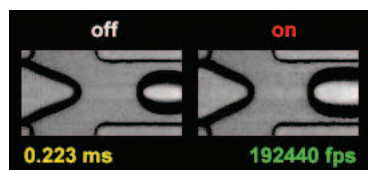

Video01.mp4 Gas-liquid interface motion at off and on mode capturing at 192440 FPS

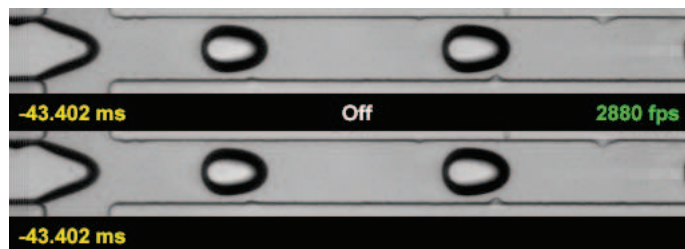

Video02.mp4 Transition of off-on and on-off modes capturing at 2880 FPS.

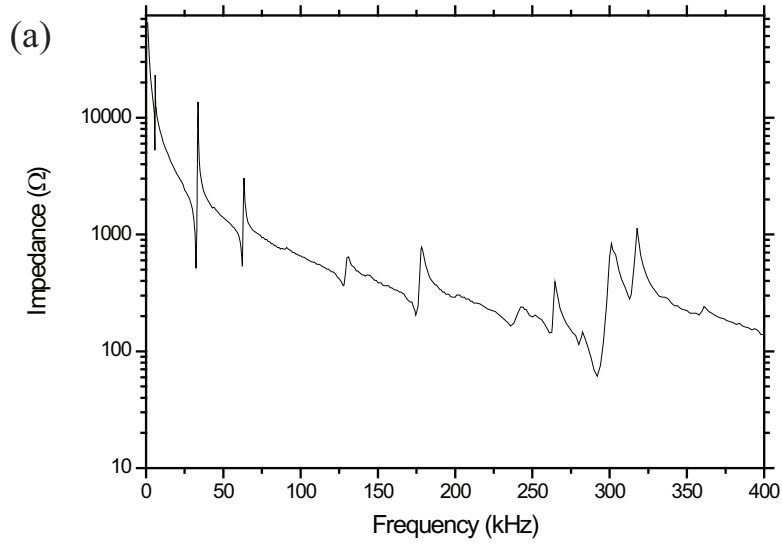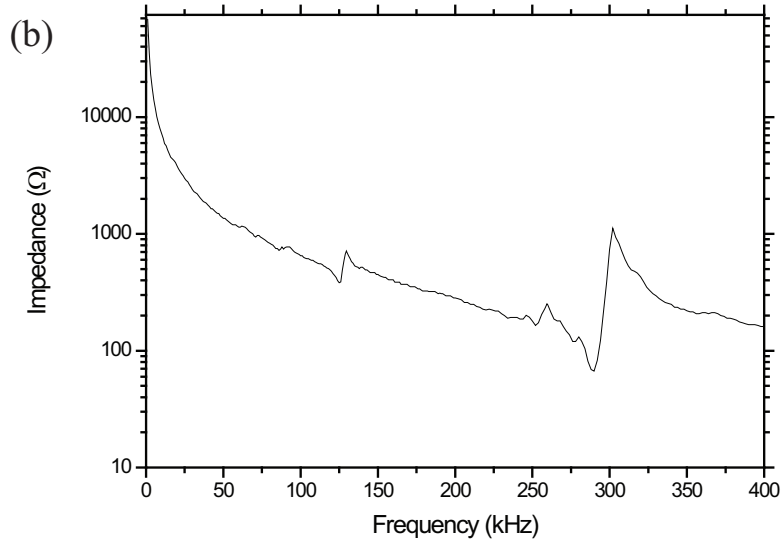

**Fig. S1** The electrical impedance of the transducer changes when it is attached to the bottom of the microfluidic device in between a layer of ultrasonic gel. The graphs show the measured impedance (a) before attachment (b) after attachment. After the attachment, the mechanical resonance frequencies of the transducer coincides and agrees with the imposed experimental frequencies.

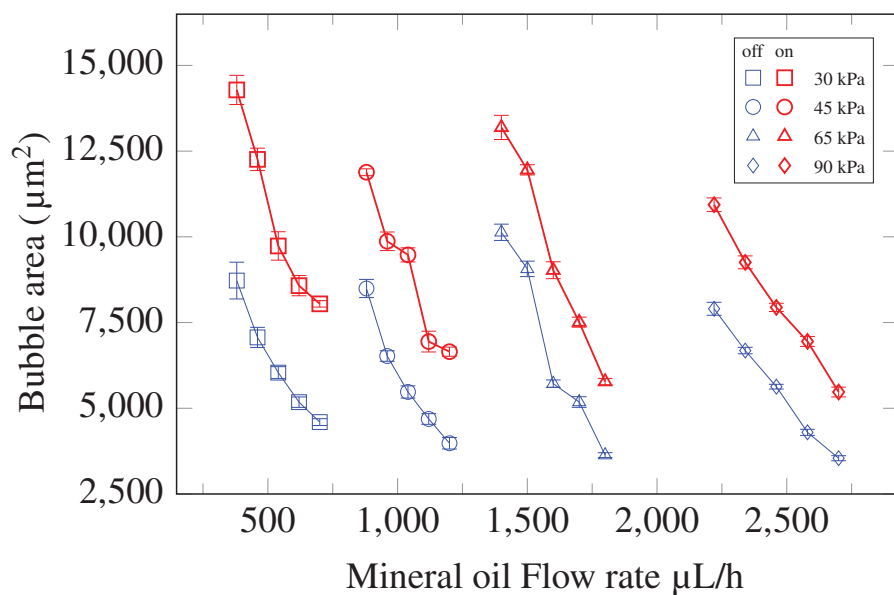

Fig. S2 Generated bubble size under different flow conditions with and without actuation.

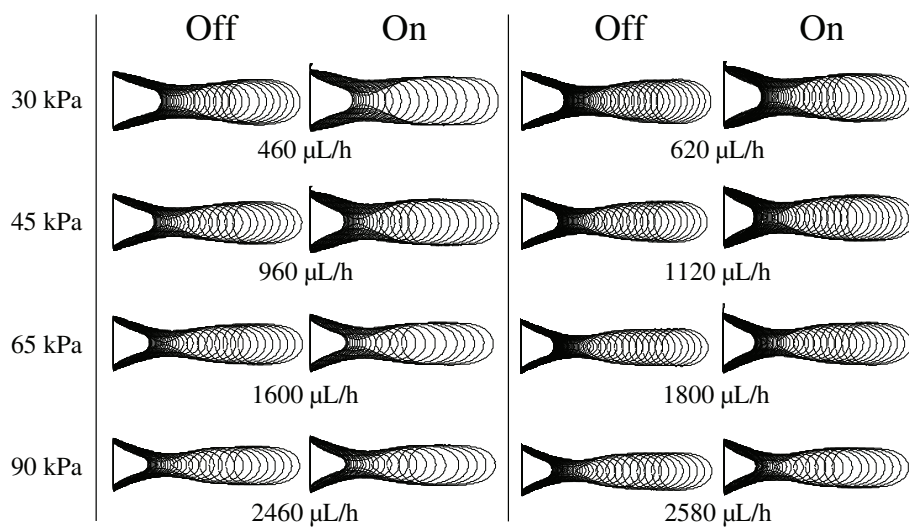

Fig. S3 Contour tracing of the expansion of gas-liquid interface during a cycle of bubble formation, with and without actuation using a transducer.
